# Supplementary material for: Electrically tunable tunneling rectification magnetoresistance in magnetic tunneling junctions with asymmetric barriers
Source: Royal Society of Chemistry journal article supplement (doi:10.1039/c7nr04431c), 2017-01-01
Supplement: c7nr04431c1.pdf [file c7nr04431c1.pdf]

**Supporting Information for**

# Electrically tunable tunneling rectification magnetoresistance in magnetic tunneling junctions with asymmetric barriers

Jing Wang,<sup>a</sup> Qikun Huang,<sup>a</sup> Peng Shi,<sup>a</sup> Kun Zhang,<sup>a</sup> Yufeng Tian,<sup>a,\*</sup> Shishen Yan,<sup>a,\*</sup>  
Yanxue Chen,<sup>a</sup> Guolei Liu,<sup>a</sup> Shishou Kang<sup>a</sup> and Liangmo Mei<sup>a</sup>

<sup>a</sup> School of Physics, State Key Laboratory of Crystal Materials, Shandong University,  
Jinan 250100, China.

\*Address correspondence to: [yftian@sdu.edu.cn](mailto:yftian@sdu.edu.cn) and [shishenyan@sdu.edu.cn](mailto:shishenyan@sdu.edu.cn)

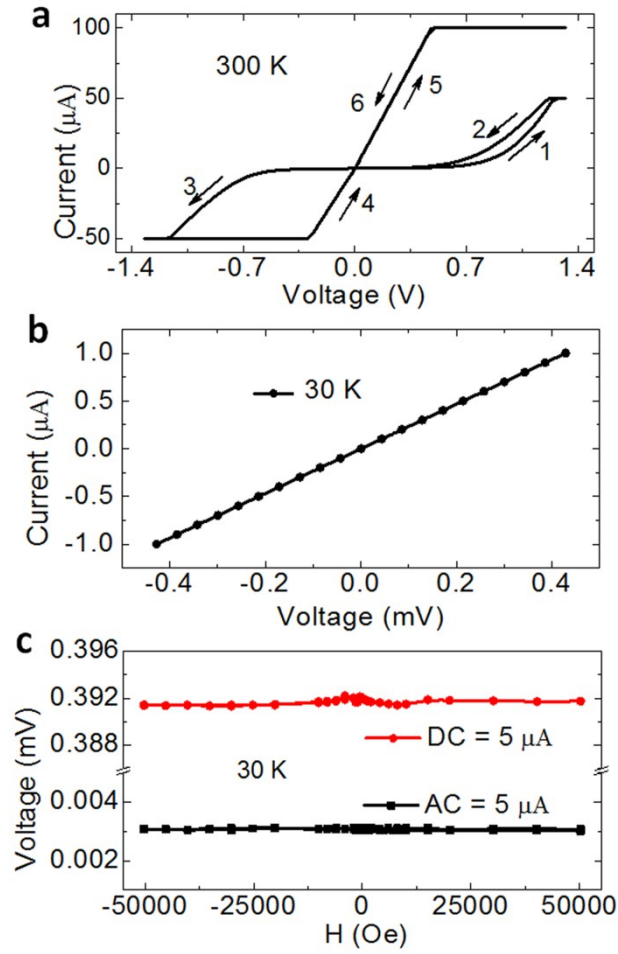

**Supplementary Figure S1. Transport properties of the studied MTJs after a soft-breakdown.** (a) The I-V characteristic of the studied MTJ. (b) The I-V curve of the soft-breakdown MTJ, where the linear I-V curve is observed. (c) The conventional MR (marked as DC) and TRMR (marked as AC) results.

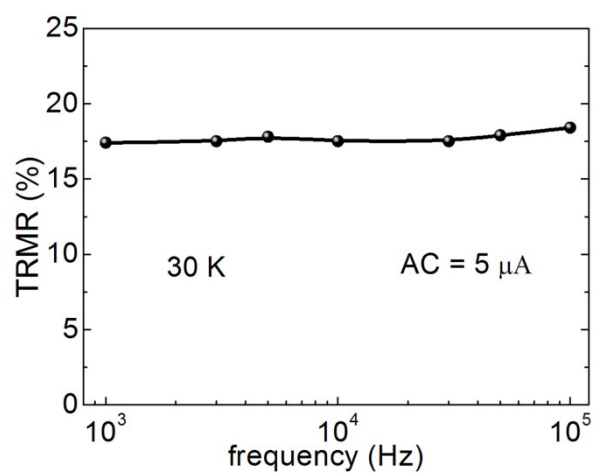

**Supplementary Figure S2. Frequency dependence of the TRMR.** The low temperature TRMR measured at different AC frequency, which keeps a constant up to the highest measurable frequency of the Keithley 6221.
